# Supplementary material for: Antiproliferative activity of berberine in HepG2 cells via inducing apoptosis and arresting cell cycle
Source: Royal Society of Chemistry journal article supplement (doi:10.1039/d1fo02783b), 2021-01-01
Supplement: d1fo02783b1.pdf [file d1fo02783b1.pdf]

## Supplementary Materials

### **Antiproliferative activity of berberine in HepG2 cells via inducing apoptosis and arresting cell cycle**

Lele Yang,<sup>a</sup> Jiliang Cao,<sup>a</sup> Jinchao Wei,<sup>a</sup> Jiagang Deng,<sup>b</sup> Xiaotao Hou,<sup>b</sup> Erwei Hao,<sup>b</sup>  
Zhengcai Du,<sup>b</sup> Liang Zou <sup>\*c</sup> and Peng Li <sup>\*a</sup>

<sup>a</sup> State Key Laboratory of Quality Research in Chinese Medicine, Institute of Chinese Medical Sciences, University of Macau, Macau 999078, China

<sup>b</sup> Collaborative Innovation Center of Research on Functional Ingredients from Agricultural Residues, Guangxi Key Laboratory of Efficacy Study on Chinese Materia Medica, Guangxi University of Chinese Medicine, Nanning 530200, China

<sup>c</sup> Key Laboratory of Coarse Cereal Processing (Ministry of Agriculture and Rural Affairs), School of Food and Biological Engineering, Chengdu University, Chengdu 610106, China

\*Corresponding author:

Email: zouliangcdu@126.com (L. Zhou); pli1978@hotmail.com (P. Li)

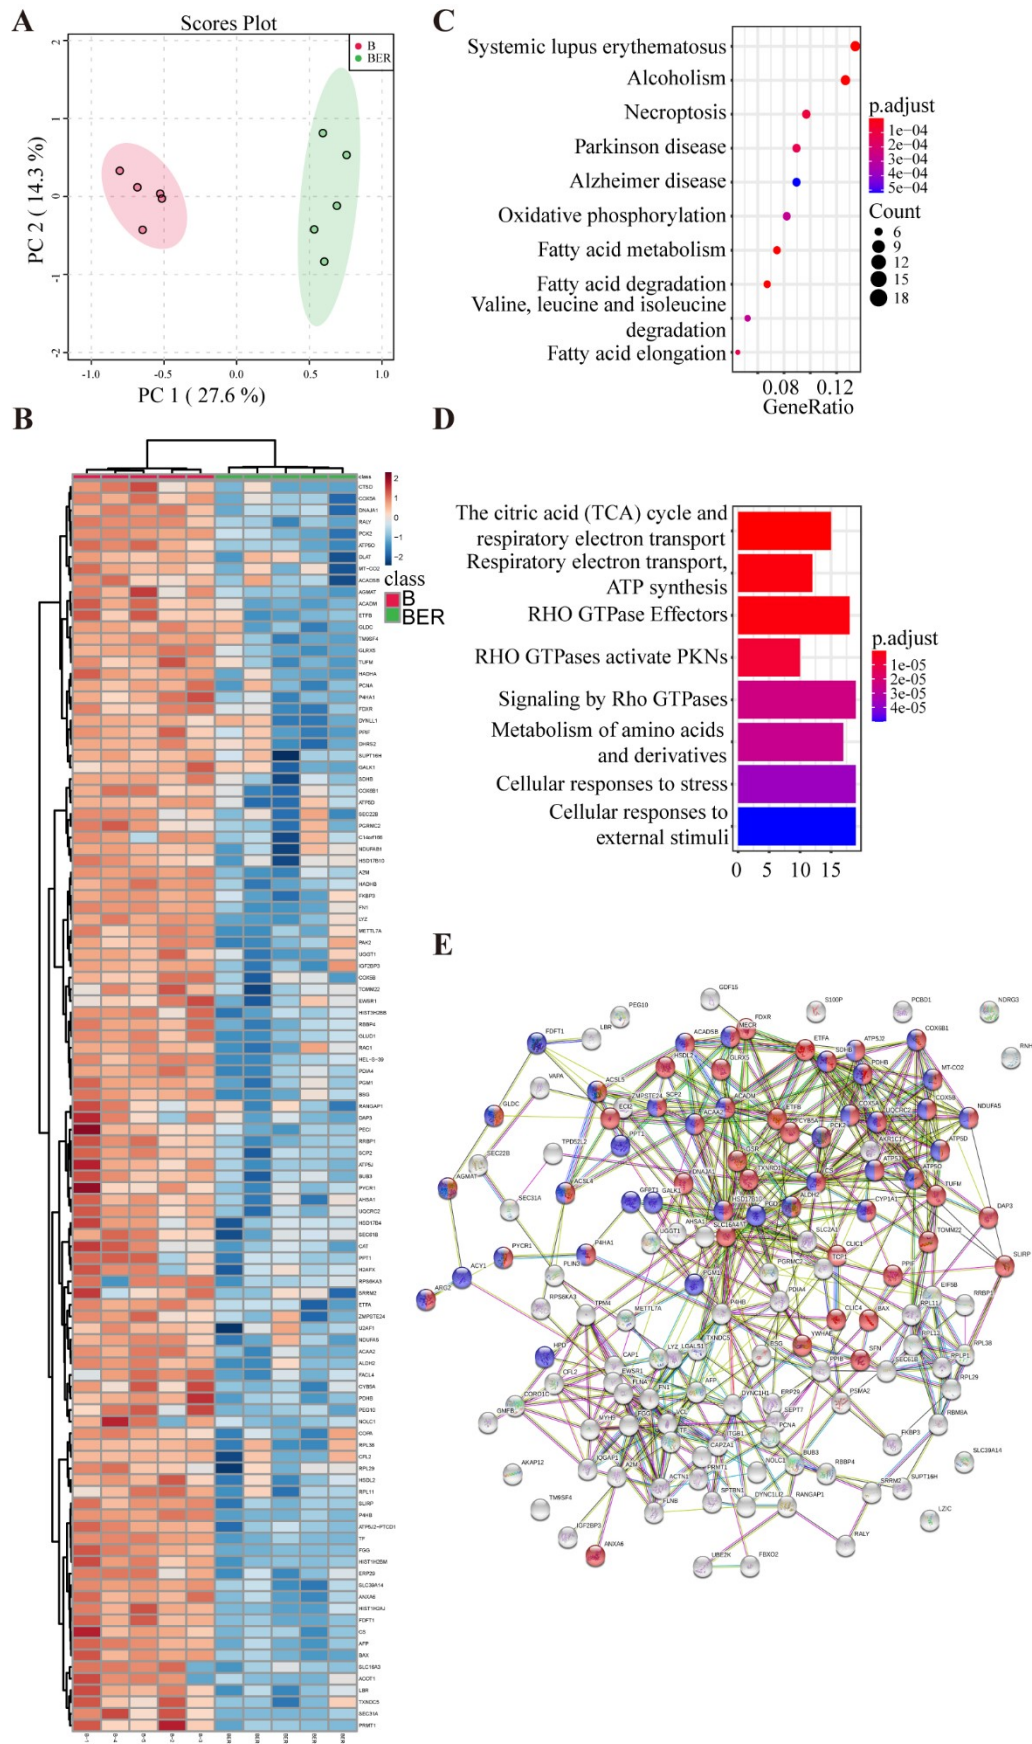

**Fig. S1.** (A) Principal component analysis plot illustrating the sample distribution of

blank control (B, red) and berberine-treated (BER, green) group. (B) Heatmap of all downregulated proteins. (C) Top 10 significant enriched KEGG pathways and (D) top 8 enriched Reactome pathways. (E) Protein-protein interaction network of altered proteins assessed with the STRING database. Proteins labeled in red and blue color were enriched in the mitochondria and metabolism pathways.

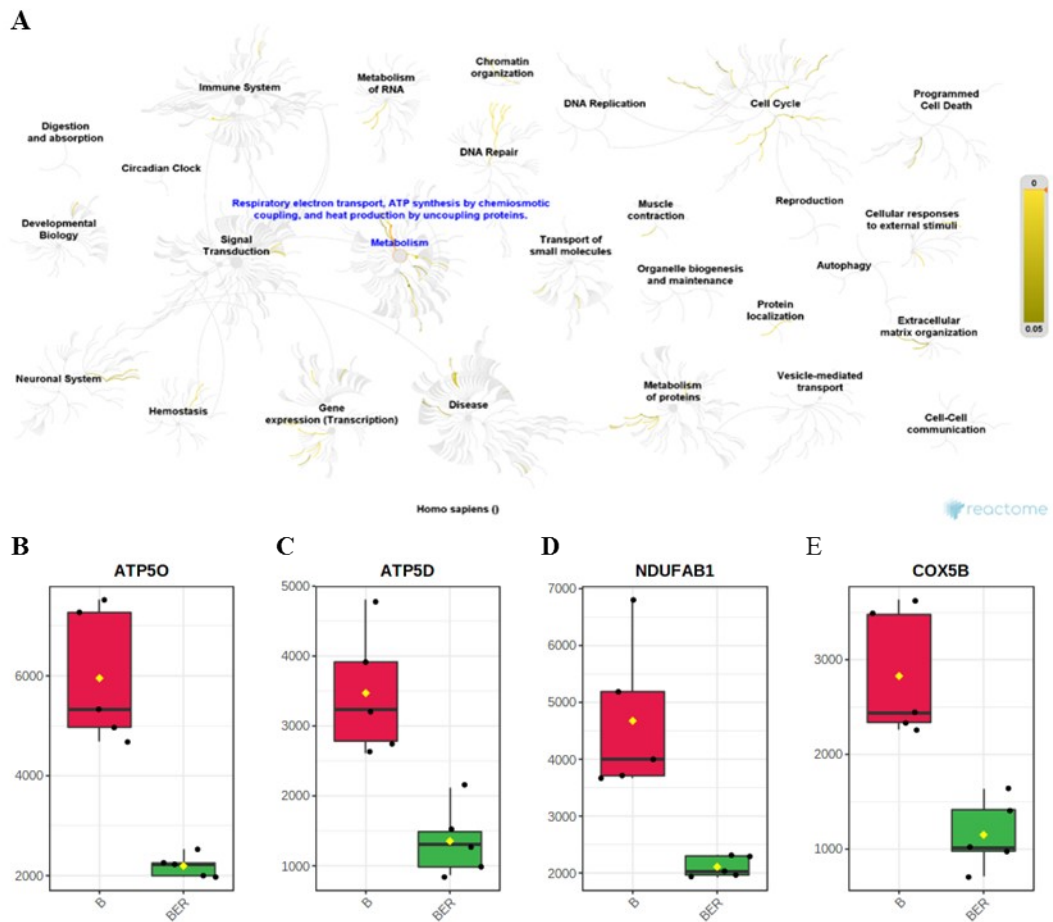

**Fig. S2.** (A) Overrepresented pathways from REACTOME pathway analysis of the altered proteins. Expression of mitochondrial dysfunction-mediated protein, including (B) ATP5O, (C) ATP5D, (D) NDUFAB1, (E) COX5B. ATP5O, ATP synthase subunit O; ATP5D, ATP synthase subunit delta; NDUFAB1, NADH dehydrogenase (ubiquinone) 1 beta subcomplex; COX5B, Cytochrome c oxidase subunit 5B.

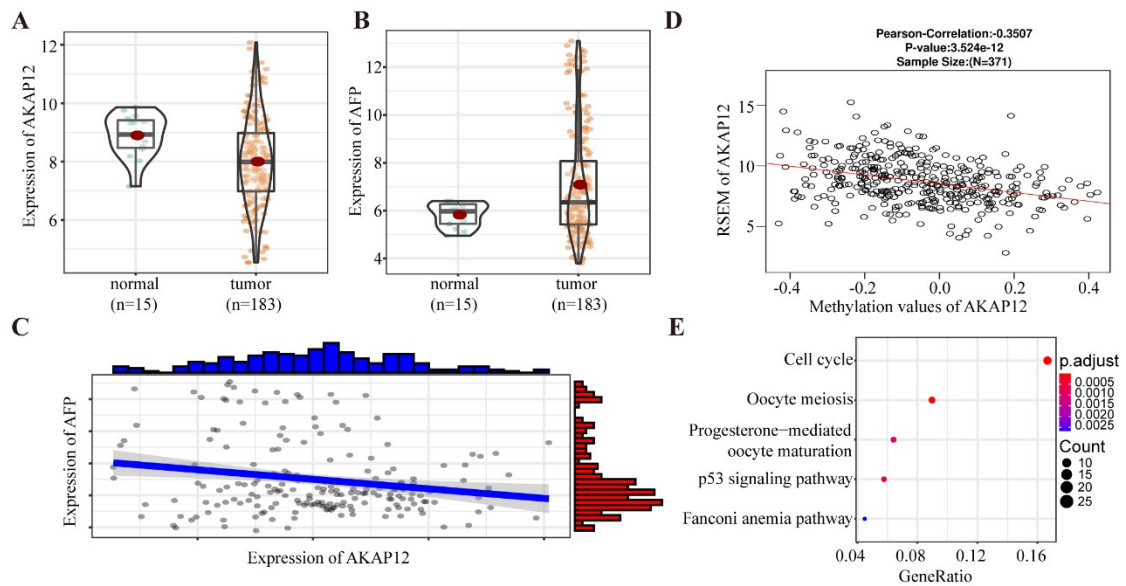

**Fig. S3.** (A, B) Box plots of AKAP12 expression ( $p \leq 0.001$ ) and AFP expression ( $p \leq 0.001$ ) in normal and tumor samples from GSE112790 dataset. (C) Correlation analysis between expression levels of AKAP12 and AFP ( $p = 0.005$ ,  $r = -0.2$ ). (D) Spearman correlation analysis of the expression of AKAP12 and its methylation levels using LinkedOmics. (E) Dot plot of the enriched GO terms using the upregulated genes obtained from TCGA LIHC dataset.

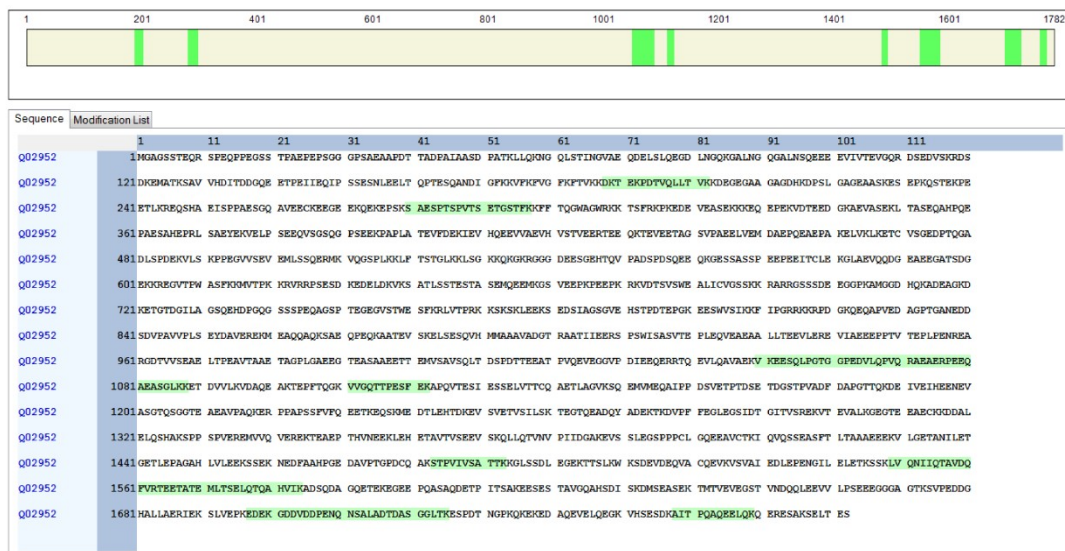

**Fig. S4.** The protein-sequence coverage of AKAP12 observed using Proteome Discoverer software (version 2.3.0).

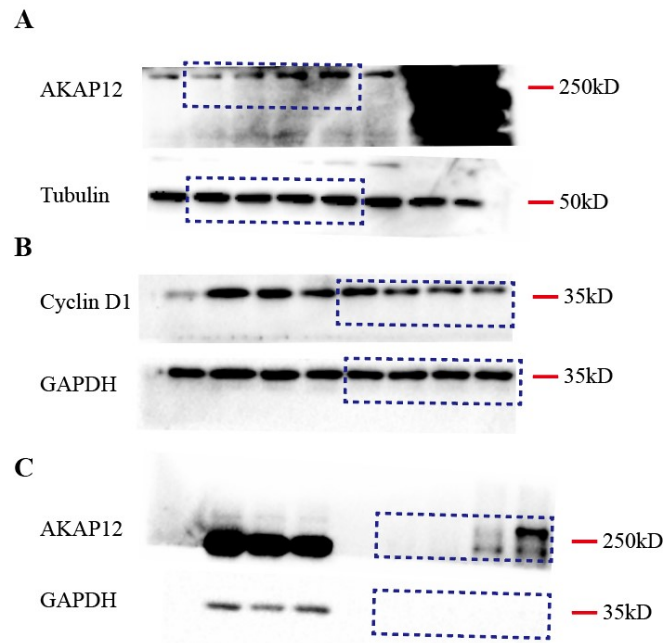

Images in support of the representative western blots data shown in Figure 6. (A, B) Western blot analysis of AKAP12 and Cyclin D1 expression. (C) Co-immunoprecipitation of AKAP12 and Cyclin D1 was visualized using immunoblots.

**Table S1.** The hub target proteins of berberine (ranked according to Clustering Coefficient).

| name   | Glax Cluster | Average Shortest Path Length | Betweenness Centrality | Closeness Centrality | Clustering Coefficient | Degree |
|--------|--------------|------------------------------|------------------------|----------------------|------------------------|--------|
| SHC1   | 1            | 2.506                        | 0.006                  | 0.399                | 0.189                  | 61     |
| SMAD4  | 3            | 2.507                        | 0.005                  | 0.399                | 0.170                  | 48     |
| PTK2   | 1            | 2.521                        | 0.006                  | 0.397                | 0.156                  | 47     |
| RAF1   | 1            | 2.452                        | 0.005                  | 0.408                | 0.146                  | 47     |
| HDAC1  | 3            | 2.480                        | 0.008                  | 0.403                | 0.120                  | 59     |
| LCK    | 1            | 2.485                        | 0.005                  | 0.402                | 0.120                  | 54     |
| BRCA1  | 3            | 2.362                        | 0.009                  | 0.423                | 0.119                  | 68     |
| BCL2   | 5            | 2.523                        | 0.006                  | 0.396                | 0.119                  | 39     |
| PIK3R1 | 1            | 2.426                        | 0.013                  | 0.412                | 0.117                  | 72     |
| SMAD2  | 3            | 2.360                        | 0.010                  | 0.424                | 0.116                  | 62     |
| STAT3  | 3            | 2.382                        | 0.010                  | 0.420                | 0.115                  | 64     |
| JUN    | 3            | 2.452                        | 0.008                  | 0.408                | 0.114                  | 73     |
| XRCC6  | 3            | 2.520                        | 0.007                  | 0.397                | 0.114                  | 33     |
| KAT5   | 3            | 2.474                        | 0.005                  | 0.404                | 0.113                  | 36     |
| RELA   | 3            | 2.492                        | 0.007                  | 0.401                | 0.112                  | 68     |
| RXRA   | 3            | 2.496                        | 0.007                  | 0.401                | 0.112                  | 56     |
| SMAD3  | 3            | 2.288                        | 0.016                  | 0.437                | 0.109                  | 79     |
| GRB2   | 1            | 2.471                        | 0.011                  | 0.405                | 0.107                  | 83     |
| CAV1   | 1            | 2.458                        | 0.012                  | 0.407                | 0.105                  | 45     |
| PRKCD  | 1            | 2.462                        | 0.007                  | 0.406                | 0.102                  | 58     |
| CCND1  | 3            | 2.527                        | 0.011                  | 0.396                | 0.101                  | 40     |

**Table S2.** Apoptosis and cell cycle-related enrichment pathways.

| term ID    | term description                                             | observed gene count | background gene count | false discovery rate | matching proteins in your network (labels)                                                                                                                                   |
|------------|--------------------------------------------------------------|---------------------|-----------------------|----------------------|------------------------------------------------------------------------------------------------------------------------------------------------------------------------------|
| GO:0042981 | regulation of apoptotic process                              | 32                  | 1501                  | 6.63E-23             | ABL1,AKT1,AR,BCL2,BRCA1,CASP3,CAV1,CDK1,CDK5,CREBBP,CSNK2A1,CTNNB1,EGFR,ESR1,FYN,GSK3B,HDAC1,JUN,LCK,PIK3R1,PRKCA,PRKCD,PTK2,RAF1,RELA,SHC1,SMAD3,SRC,STAT3,TP53,YWHAG,YWHAZ |
| GO:0043066 | negative regulation of apoptotic process                     | 27                  | 859                   | 1.19E-22             | ABL1,AKT1,AR,BCL2,BRCA1,CASP3,CAV1,CDK1,CSNK2A1,CTNNB1,EGFR,FYN,GSK3B,HDAC1,JUN,PIK3R1,PRKCA,PRKCD,PTK2,RAF1,RELA,SHC1,SMAD3,SRC,STAT3,TP53,YWHAZ                            |
| GO:2001233 | regulation of apoptotic signaling pathway                    | 18                  | 388                   | 2.53E-17             | AKT1,AR,BCL2,BRCA1,CAV1,CSNK2A1,CTNNB1,FYN,GSK3B,LCK,PRKCD,RAF1,RELA,SMAD3,SRC,TP53,YWHAG,YWHAZ                                                                              |
| GO:0006915 | apoptotic process                                            | 22                  | 915                   | 7.26E-16             | ABL1,AKT1,BCL2,BRCA1,CASP3,CAV1,CDK1,CDK5,CSNK2A1,EP300,GSK3B,JUN,MAPK1,MAPK3,NR3C1,PIK3R1,PRKCA,PRKCD,RAF1,RB1,SMAD3,TP53                                                   |
| GO:0097190 | apoptotic signaling pathway                                  | 14                  | 295                   | 1.49E-13             | ABL1,BCL2,BRCA1,CASP3,CAV1,EP300,GSK3B,JUN,PIK3R1,PRKCA,PRKCD,RAF1,SMAD3,TP53                                                                                                |
| GO:0043065 | positive regulation of apoptotic process                     | 16                  | 604                   | 6.72E-12             | ABL1,AKT1,BCL2,CASP3,CAV1,CDK5,CTNNB1,GSK3B,JUN,LCK,PRKCD,SMAD3,SRC,TP53,YWHAG,YWHAZ                                                                                         |
| GO:2001234 | negative regulation of apoptotic signaling pathway           | 10                  | 218                   | 1.29E-09             | AKT1,AR,BCL2,BRCA1,CSNK2A1,CTNNB1,FYN,RAF1,RELA,SRC                                                                                                                          |
| GO:2001236 | regulation of extrinsic apoptotic signaling pathway          | 9                   | 158                   | 1.87E-09             | AKT1,AR,BCL2,BRCA1,CAV1,FYN,RAF1,RELA,SRC                                                                                                                                    |
| GO:2001237 | negative regulation of extrinsic apoptotic signaling pathway | 8                   | 104                   | 2.17E-09             | AKT1,AR,BCL2,BRCA1,FYN,RAF1,RELA,SRC                                                                                                                                         |
| GO:0045930 | negative regulation of mitotic cell cycle                    | 11                  | 243                   | 1.79E-10             | ABL1,BCL2,BRCA1,CCND1,CDK1,CTNNB1,EGFR,EP300,RB1,SMAD3,TP53                                                                                                                  |
| GO:1901990 | regulation of mitotic cell cycle phase transition            | 12                  | 351                   | 4.23E-10             | AKT1,BCL2,BRCA1,CCND1,CDK1,EGFR,EP300,HSP90AA1,PRKACA,RB1,TP53,YWHAG                                                                                                         |
| GO:0010564 | regulation of cell cycle process                             | 15                  | 684                   | 4.55E-10             | AKT1,BCL2,BRCA1,CCND1,CDK1,CDK5,CSNK2A1,CTNNB1,EGFR,EP300,HSP90AA1,PRKACA,RB1,TP53,YWHAG                                                                                     |
| GO:0045787 | positive regulation of cell cycle                            | 12                  | 376                   | 8.59E-10             | ABL1,AKT1,BRCA1,CCND1,CDK1,EGFR,EP300,PRKACA,PRKCA,RB1,SRC,TP53                                                                                                              |
| GO:0045786 | negative regulation of cell cycle                            | 13                  | 517                   | 2.04E-09             | ABL1,BCL2,BRCA1,CASP3,CCND1,CDK1,CDK5,CTNNB1,EGFR,EP300,RB1,SMAD3,TP53                                                                                                       |
| GO:2000045 | regulation of G1/S transition of mitotic cell cycle          | 8                   | 148                   | 2.68E-08             | AKT1,BCL2,CCND1,CDK1,EGFR,EP300,RB1,TP53                                                                                                                                     |
| GO:0071156 | regulation of cell cycle arrest                              | 7                   | 111                   | 9.42E-08             | BRCA1,CCND1,CDK1,CDK5,EP300,PRKACA,TP53                                                                                                                                      |
| GO:0022402 | cell cycle process                                           | 13                  | 890                   | 8.16E-07             | ABL1,BRCA1,CCND1,CDK1,CTNNB1,EP300,HSP90AA1,PRKACA,PRKCA,RB1,SMAD3,TP53,YWHAG                                                                                                |
| GO:1901991 | negative regulation of mitotic cell cycle phase transition   | 7                   | 160                   | 8.70E-07             | BCL2,BRCA1,CCND1,CDK1,EP300,RB1,TP53                                                                                                                                         |
| GO:2000134 | negative regulation of G1/S transition of mitotic cell cycle | 6                   | 97                    | 1.03E-06             | BCL2,CCND1,CDK1,EP300,RB1,TP53                                                                                                                                               |
| GO:0000278 | mitotic cell cycle                                           | 11                  | 628                   | 1.49E-06             | ABL1,BRCA1,CCND1,CDK1,EP300,HSP90AA1,PRKACA,PRKCA,RB1,TP53,YWHAG                                                                                                             |
| hsa04210   | Apoptosis                                                    | 10                  | 135                   | 4.83E-12             | AKT1,BCL2,CASP3,JUN,MAPK1,MAPK3,PIK3R1,RAF1,RELA,TP53                                                                                                                        |

|          |                              |    |     |          |                                                                                                                                                                               |
|----------|------------------------------|----|-----|----------|-------------------------------------------------------------------------------------------------------------------------------------------------------------------------------|
| hsa04215 | Apoptosis - multiple species | 2  | 31  | 0.0037   | BCL2,CASP3                                                                                                                                                                    |
| hsa05200 | Pathways in cancer           | 31 | 515 | 4.81E-35 | ABL1,AKT1,AR,BCL2,CASP3,CCND1,CREBBP,CTNNB1,EGFR,EP300,ESR1,GRB2,GSK3B,HDAC1,HSP90AA1,JUN,MAPK1,MAPK3,PIK3R1,PRKACA,PRKCA,PTK2,RAF1,RB1,RELA,RXR,SMAD2,SMAD3,SMAD4,STAT3,TP53 |
| hsa05225 | Hepatocellular carcinoma     | 17 | 163 | 3.07E-22 | AKT1,CCND1,CTNNB1,EGFR,GRB2,GSK3B,MAPK1,MAPK3,PIK3R1,PRKCA,RAF1,RB1,SHC1,SMAD2,SMAD3,SMAD4,TP53                                                                               |
| hsa04110 | Cell cycle                   | 14 | 123 | 5.97E-19 | ABL1,CCND1,CDK1,CREBBP,EP300,GSK3B,HDAC1,RB1,SMAD2,SMAD3,SMAD4,TP53,YWHAG,YWHAZ                                                                                               |
| hsa04217 | Necroptosis                  | 3  | 155 | 0.0081   | BCL2,HSP90AA1,STAT3                                                                                                                                                           |

---



**Table S3.** Dysregulated proteins in berberine-treated group compared to control (ranked according to fold change).

| No. | Unique peptides | Sequence coverage [%] | MS/MS count | Log Student's T-test p-value | Student's T-test Difference | Gene names |
|-----|-----------------|-----------------------|-------------|------------------------------|-----------------------------|------------|
| 1   | 16              | 45.2                  | 114         | 4.9                          | -4.7                        | AFP        |
| 2   | 9               | 32.6                  | 30          | 5.8                          | -2.8                        | FGG        |
| 3   | 8               | 70.1                  | 55          | 4.4                          | -2.6                        | SLIRP      |
| 4   | 6               | 6.5                   | 28          | 3.9                          | -2.5                        | FN1        |
| 5   | 8               | 8.5                   | 26          | 4.2                          | -2.3                        | A2M        |
| 6   | 24              | 44                    | 199         | 6.6                          | -2.3                        | TF         |
| 7   | 3               | 31.8                  | 37          | 3.6                          | -2.1                        | LYZ        |
| 8   | 8               | 26.7                  | 52          | 2.9                          | -1.9                        | PEG10      |
| 9   | 6               | 25.7                  | 60          | 3.5                          | -1.9                        | ACADM      |
| 10  | 4               | 15.2                  | 96          | 3.8                          | -1.8                        | SLC39A14   |
| 11  | 6               | 15.1                  | 16          | 3.3                          | -1.8                        | P4HA1      |
| 12  | 3               | 14.5                  | 16          | 2.4                          | -1.8                        | HSDL2      |
| 13  | 4               | 24.7                  | 25          | 1.8                          | -1.7                        | MT-CO2     |
| 14  | 2               | 15                    | 25          | 3.1                          | -1.7                        | METTL7A    |
| 15  | 2               | 21                    | 12          | 4.2                          | -1.7                        | GLRX5      |
| 16  | 5               | 23.7                  | 34          | 1.6                          | -1.7                        | NDUFAB1    |
| 17  | 12              | 13.9                  | 19          | 3.6                          | -1.7                        | SEC31A     |
| 18  | 4               | 10.1                  | 90          | 1.8                          | -1.7                        | SLC16A3    |
| 19  | 3               | 12.9                  | 9           | 2.5                          | -1.5                        | SDHB       |
| 20  | 4               | 8.2                   | 10          | 1.4                          | -1.5                        | RPS6KA3    |
| 21  | 2               | 19.1                  | 18          | 2.0                          | -1.5                        | PPT1       |
| 22  | 4               | 57                    | 12          | 2.2                          | -1.5                        | COX6B1     |
| 23  | 3               | 53.1                  | 47          | 2.7                          | -1.5                        | CYB5A      |
| 24  | 3               | 13.9                  | 62          | 2.3                          | -1.5                        | AHSA1      |
| 25  | 2               | 9.3                   | 17          | 2.3                          | -1.4                        | COX5B      |

|    |    |      |     |     |      |           |
|----|----|------|-----|-----|------|-----------|
| 26 | 7  | 7.3  | 19  | 2.3 | -1.4 | UGGT1     |
| 27 | 2  | 11.9 | 22  | 1.6 | -1.4 | ACOT1     |
| 28 | 5  | 27.9 | 23  | 1.4 | -1.3 | C14orf166 |
| 29 | 3  | 5.8  | 8   | 2.3 | -1.3 | GLDC      |
| 30 | 6  | 18.8 | 41  | 1.9 | -1.3 | IGF2BP3   |
| 31 | 2  | 7.5  | 3   | 1.5 | -1.3 | DLAT      |
| 32 | 11 | 31.6 | 57  | 4.2 | -1.3 | HADHB     |
| 33 | 6  | 19.8 | 13  | 2.5 | -1.3 | PECI      |
| 34 | 2  | 47.6 | 74  | 3.1 | -1.2 | HIST3H2BB |
| 35 | 2  | 17.2 | 7   | 1.8 | -1.2 | RAC1      |
| 36 | 2  | 11.6 | 19  | 2.7 | -1.2 | FKBP3     |
| 37 | 5  | 15.1 | 18  | 3.3 | -1.2 | PGM1      |
| 38 | 18 | 42.5 | 173 | 3.9 | -1.2 | PCK2      |
| 39 | 3  | 37.5 | 79  | 1.8 | -1.2 | ATP5D     |
| 40 | 8  | 54.5 | 71  | 4.0 | -1.2 | ATP5O     |
| 41 | 6  | 14.7 | 9   | 1.4 | -1.2 | RANGAP1   |
| 42 | 2  | 61.9 | 30  | 1.4 | -1.2 | RPL38     |
| 43 | 20 | 52.4 | 480 | 2.9 | -1.1 | TUFM      |
| 44 | 4  | 48.6 | 110 | 1.9 | -1.1 | TOMM22    |
| 45 | 16 | 20.4 | 30  | 1.7 | -1.1 | COPA      |
| 46 | 4  | 9.7  | 7   | 2.7 | -1.1 | TM9SF4    |
| 47 | 8  | 33.7 | 283 | 2.9 | -1.1 | CTSD      |
| 48 | 3  | 12.4 | 25  | 2.1 | -1.1 | PAK2      |
| 49 | 10 | 43   | 135 | 3.0 | -1.1 | UQCRC2    |
| 50 | 4  | 40.7 | 150 | 3.0 | -1.0 | COX5A     |
| 51 | 6  | 48.7 | 168 | 1.7 | -1.0 | HSD17B10  |
| 52 | 10 | 44.2 | 91  | 2.1 | -1.0 | PYCR1     |
| 53 | 0  | 55.2 | 152 | 1.3 | -1.0 | H2AFX     |
| 54 | 7  | 32.9 | 61  | 4.6 | -1.0 | RALY      |

|    |    |      |      |     |      |              |
|----|----|------|------|-----|------|--------------|
| 55 | 8  | 33.5 | 52   | 4.1 | -1.0 | ACAA2        |
| 56 | 4  | 25.6 | 43   | 1.5 | -1.0 | SEC22B       |
| 57 | 3  | 57.4 | 48   | 3.7 | -1.0 | ATP5J2-PTCD1 |
| 58 | 3  | 44.8 | 18   | 2.3 | -1.0 | NDUFA5       |
| 59 | 0  | 66.2 | 1095 | 4.4 | -1.0 | HIST1H2AJ    |
| 60 | 3  | 44.4 | 56   | 3.4 | -0.9 | ATP5J        |
| 61 | 5  | 37.3 | 118  | 3.9 | -0.9 | RBBP4        |
| 62 | 4  | 4.9  | 16   | 1.6 | -0.9 | SUPT16H      |
| 63 | 3  | 61.9 | 1271 | 4.2 | -0.9 | GLUD1        |
| 64 | 2  | 41.6 | 55   | 1.3 | -0.9 | CFL2         |
| 65 | 11 | 29.6 | 69   | 2.4 | -0.9 | CAT          |
| 66 | 3  | 18.4 | 6    | 1.8 | -0.9 | PGRMC2       |
| 67 | 17 | 35.7 | 103  | 4.1 | -0.9 | ANXA6        |
| 68 | 14 | 56.7 | 735  | 4.0 | -0.9 | HEL-S-39     |
| 69 | 14 | 50.9 | 167  | 3.2 | -0.9 | ALDH2        |
| 70 | 7  | 45.4 | 198  | 3.2 | -0.9 | BSG          |
| 71 | 2  | 16.6 | 28   | 1.3 | -0.9 | RPL29        |
| 72 | 10 | 52.1 | 271  | 3.1 | -0.9 | ETFA         |
| 73 | 2  | 6.2  | 3    | 3.1 | -0.9 | LBR          |
| 74 | 3  | 30.9 | 276  | 2.3 | -0.9 | PPIF         |
| 75 | 8  | 37.9 | 257  | 1.9 | -0.9 | DHRS2        |
| 76 | 7  | 33.8 | 145  | 3.4 | -0.9 | DNAJA1       |
| 77 | 8  | 32.4 | 140  | 3.4 | -0.9 | AGMAT        |
| 78 | 2  | 47.6 | 1165 | 4.7 | -0.8 | HIST1H2BM    |
| 79 | 1  | 9.7  | 140  | 1.7 | -0.8 | NOLC1        |
| 80 | 16 | 47.3 | 170  | 2.6 | -0.8 | FDXR         |
| 81 | 6  | 44.4 | 240  | 2.2 | -0.8 | RPL11        |
| 82 | 3  | 13.7 | 11   | 1.6 | -0.8 | DAP3         |
| 83 | 5  | 20   | 94   | 1.3 | -0.8 | U2AF1        |

|     |    |      |      |     |      |          |
|-----|----|------|------|-----|------|----------|
| 84  | 4  | 35.4 | 10   | 4.9 | -0.8 | BAX      |
| 85  | 13 | 32.7 | 163  | 2.8 | -0.8 | FACL4    |
| 86  | 4  | 21.7 | 16   | 1.8 | -0.8 | ZMPSTE24 |
| 87  | 24 | 45.6 | 362  | 3.5 | -0.8 | HADHA    |
| 88  | 8  | 31.3 | 133  | 3.5 | -0.7 | CS       |
| 89  | 9  | 41.8 | 426  | 2.9 | -0.7 | ERP29    |
| 90  | 4  | 19.4 | 32   | 2.7 | -0.7 | BUB3     |
| 91  | 13 | 33.3 | 109  | 2.1 | -0.7 | HSD17B4  |
| 92  | 3  | 13.6 | 10   | 1.5 | -0.7 | GALK1    |
| 93  | 36 | 75.6 | 3914 | 6.8 | -0.7 | P4HB     |
| 94  | 3  | 49.4 | 29   | 1.4 | -0.7 | DYNLL1   |
| 95  | 33 | 56.3 | 853  | 3.6 | -0.7 | PDIA4    |
| 96  | 33 | 28.5 | 511  | 4.0 | -0.7 | RRBP1    |
| 97  | 7  | 22.1 | 54   | 5.0 | -0.7 | FDFT1    |
| 98  | 3  | 51   | 8    | 2.1 | -0.7 | SEC61B   |
| 99  | 13 | 44.2 | 199  | 2.2 | -0.7 | TXNDC5   |
| 100 | 4  | 5.9  | 29   | 3.1 | -0.7 | SCP2     |
| 101 | 9  | 33.1 | 296  | 1.5 | -0.6 | ACADSB   |
| 102 | 8  | 34.5 | 86   | 2.5 | -0.6 | ETFB     |
| 103 | 10 | 55.2 | 494  | 2.4 | -0.6 | PCNA     |
| 104 | 6  | 23.2 | 24   | 3.8 | -0.6 | PDHB     |
| 105 | 4  | 11.7 | 131  | 1.5 | -0.6 | EWSR1    |
| 106 | 5  | 22.1 | 12   | 3.0 | -0.6 | PRMT1    |
| 107 | 3  | 1.6  | 15   | 1.4 | -0.6 | SRRM2    |
| 108 | 43 | 25   | 503  | 3.6 | 0.6  | FLNA     |
| 109 | 20 | 56.6 | 260  | 3.7 | 0.6  | ACTN1    |
| 110 | 4  | 20.4 | 109  | 1.6 | 0.6  | RPL13    |
| 111 | 4  | 4.8  | 5    | 1.4 | 0.6  | IQGAP1   |
| 112 | 4  | 31.2 | 233  | 2.2 | 0.6  | CLIC4    |

|     |     |      |      |     |     |         |
|-----|-----|------|------|-----|-----|---------|
| 113 | 15  | 48.4 | 176  | 2.0 | 0.6 | GSR     |
| 114 | 17  | 5.7  | 38   | 1.4 | 0.6 | DYNC1H1 |
| 115 | 18  | 43.9 | 208  | 2.9 | 0.6 | YARS    |
| 116 | 4   | 28.5 | 28   | 1.5 | 0.6 | VAPA    |
| 117 | 24  | 60.1 | 464  | 1.9 | 0.7 | TCP1    |
| 118 | 4   | 26.1 | 168  | 2.2 | 0.7 | PSMA2   |
| 119 | 14  | 58.1 | 159  | 2.3 | 0.7 | RNH1    |
| 120 | 17  | 83   | 1150 | 4.2 | 0.7 | CLIC1   |
| 121 | 3   | 7.6  | 10   | 1.4 | 0.7 | ACY1    |
| 122 | 10  | 42.2 | 176  | 2.3 | 0.7 | PLIN3   |
| 123 | 20  | 62.9 | 1003 | 2.7 | 0.7 | CAP1    |
| 124 | 8   | 13.1 | 31   | 2.5 | 0.7 | ITGB1   |
| 125 | 14  | 62.7 | 764  | 1.6 | 0.7 | YWHAE   |
| 126 | 23  | 62.5 | 768  | 4.4 | 0.7 | PGD     |
| 127 | 1   | 80.5 | 2996 | 2.7 | 0.7 | AKR1C1  |
| 128 | 4   | 94.7 | 1507 | 1.4 | 0.7 | RPLP1   |
| 129 | 8   | 51.4 | 144  | 1.7 | 0.8 | CAPZA1  |
| 130 | 53  | 35.5 | 728  | 5.4 | 0.8 | FLNB    |
| 131 | 4   | 11.7 | 4    | 2.0 | 0.8 | SEPT7   |
| 132 | 2   | 10.6 | 12   | 2.8 | 0.9 | NDRG3   |
| 133 | 4   | 33   | 23   | 1.5 | 0.9 | UBE2K   |
| 134 | 22  | 42.7 | 270  | 6.1 | 0.9 | GFPT1   |
| 135 | 101 | 58.3 | 1779 | 7.7 | 0.9 | SPTBN1  |
| 136 | 6   | 49.5 | 325  | 1.9 | 0.9 | TPD52L2 |
| 137 | 9   | 17.1 | 482  | 4.7 | 0.9 | SLC2A1  |
| 138 | 23  | 23.9 | 252  | 2.2 | 0.9 | MYH9    |
| 139 | 5   | 18.1 | 28   | 2.5 | 0.9 | CORO1C  |
| 140 | 4   | 6.2  | 5    | 1.4 | 0.9 | EIF5B   |
| 141 | 7   | 48.8 | 159  | 2.9 | 1.0 | TPM4    |

|     |    |      |     |     |     |         |
|-----|----|------|-----|-----|-----|---------|
| 142 | 3  | 27.3 | 5   | 1.3 | 1.0 | GMFB    |
| 143 | 2  | 11.5 | 11  | 2.4 | 1.2 | FBXO2   |
| 144 | 3  | 9.7  | 12  | 1.8 | 1.2 | HPD     |
| 145 | 3  | 32.2 | 12  | 2.8 | 1.2 | RBM8A   |
| 146 | 9  | 14.9 | 30  | 1.8 | 1.2 | VCL     |
| 147 | 4  | 45.2 | 37  | 2.1 | 1.3 | PCBD    |
| 148 | 13 | 60.5 | 761 | 2.8 | 1.3 | SFN     |
| 149 | 4  | 33.8 | 81  | 2.5 | 1.4 | CHCHD2  |
| 150 | 2  | 22.3 | 16  | 1.4 | 1.5 | LZIC    |
| 151 | 6  | 58.5 | 121 | 4.2 | 1.5 | LGALS1  |
| 152 | 5  | 71.6 | 624 | 3.4 | 1.5 | S100P   |
| 153 | 4  | 64.8 | 47  | 3.8 | 1.8 | S100A11 |
| 154 | 4  | 20.9 | 18  | 4.0 | 1.8 | ARG2    |
| 155 | 17 | 28.6 | 164 | 5.9 | 2.1 | ACSL5   |
| 156 | 9  | 40.2 | 184 | 6.1 | 2.6 | SQSTM1  |
| 157 | 14 | 41.3 | 171 | 2.8 | 2.6 | TXNRD1  |
| 158 | 12 | 45.1 | 215 | 6.3 | 3.5 | GDF15   |
| 159 | 7  | 22.6 | 116 | 6.1 | 3.8 | CYP1A1  |
| 160 | 28 | 30.7 | 174 | 6.5 | 4.4 | AKAP12  |

---
